# Supplementary material for: Genomic and Functional Variation of the Chlorophyll d-Producing Cyanobacterium Acaryochloris marina
Source: MDPI journal article supplement (doi:10.3390/microorganisms10030569), 2022-03-06

**Table S1. Sampling information for *A. marina* strain collection.**

| Strain       | Location                            | Sampling info                                                        | Collection Date |
|--------------|-------------------------------------|----------------------------------------------------------------------|-----------------|
| S1           | Shelter Cove, CA                    | Upper intertidal pool, from surface of <i>Mastocarpus papillatus</i> | 7/20/16         |
| S7           | Shelter Cove, CA                    | Surface of <i>Corallina</i> sp.                                      | 7/20/16         |
| S9           | Shelter Cove, CA                    | Surface of <i>Schizymenia pacifica</i>                               | 7/20/16         |
| S15          | Shelter Cove, CA                    | Surface of <i>Pikea pinnata</i>                                      | 7/20/16         |
| HP1          | Hug Point State Park, OR            | Algae on upper intertidal rocks                                      | 6/28/17         |
| HP3          | Hug Point State Park, OR            | Algae on upper intertidal rocks                                      | 6/28/17         |
| HP5          | Hug Point State Park, OR            | Algae on upper intertidal rocks                                      | 6/28/17         |
| HP8          | Hug Point State Park, OR            | Algae on upper intertidal rocks                                      | 6/28/17         |
| HP9          | Hug Point State Park, OR            | Algae on upper intertidal rocks                                      | 6/28/17         |
| HP10         | Hug Point State Park, OR            | Algae on upper intertidal rocks                                      | 6/28/17         |
| HP11         | Hug Point State Park, OR            | Algae on upper intertidal rocks                                      | 6/28/17         |
| MSP2         | MacKerricher State Park, CA         | Surface of coralline red alga                                        | 5/28/18         |
| GR1          | Glover's Reef, Belize               | Red algae from floating lagoon mat                                   | 1/16/18         |
| Awaji (MU01) | Esaki, Awajishima, Hyogo, Japan     | Epiphyte of red alga, <i>Ahnfeltiopsis flabelliformis</i>            | 2001            |
| MU03         | Muroran, Hokkaido, Japan            | Epiphyte of red alga, <i>Ahnfeltiopsis flabelliformis</i>            | 3/7/06          |
| MU04         | Muroran, Hokkaido, Japan            | Endophyte of red alga, <i>Ahnfeltiopsis flabelliformis</i>           | 3/7/06          |
| MU05         | Arabian Sea                         | Epiphyte of red alga, <i>Gelidium</i> sp.                            | 5/3/06          |
| MU06         | Tanoshiro, Awajishima, Hyogo, Japan | Epiphyte of red alga, <i>Callophyllis japonica</i>                   | 6/9/06          |
| MU07         | Yura, Awajishima, Hyogo, Japan      | Epiphyte of red alga, <i>Callophyllis japonica</i>                   | 8/10/06         |
| MU08         | South China Sea                     | Epiphyte of red alga (unidentified)                                  | 1/8/07          |
| MU09         | Enoshima, Kanagawa, Japan           | Epiphyte of red alga, <i>Ahnfeltiopsis flabelliformis</i>            | 2/3/07          |
| MU10         | Gushikami, Okinawa, Japan           | Epiphyte of red alga (unidentified)                                  | 2/7/07          |
| MU11         | Bise, Okinawa, Japan                | Isolate from tunicate, <i>Diplosoma virens</i>                       | 4/3/07          |
| MU12         | Bise, Okinawa, Japan                | Isolate from tunicate, <i>Trididemnum clinides</i>                   | 4/3/07          |
| MU13         | Kurimajima, Okinawa, Japan          | Isolate from tunicate, <i>Lissoclinum punctatum</i>                  | 12/10/08        |
| NIES2412     | Muroran, Hokkaido, Japan            | Seaweed (unidentified)                                               | 6/20/04         |
| CCMEE 5410   | Salton Sea, CA                      | Epilithic microbial mat                                              | 1999            |
| MBIC11017    | Republic of Palau coastline         | Surface of colonial ascidian, <i>Lissoclinum patella</i>             | 1996            |
| P4           | Praia de Carcavelos, Portugal       | Algae from intertidal rocks                                          | 10/24/18        |
| P9           | Praia de Carcavelos, Portugal       | Algae from intertidal rocks                                          | 10/24/18        |
| FH1          | Friday Harbor, San Juan Island, WA  | Algal samples from dock tires                                        | 1/5/19          |
| FH2          | Friday Harbor, San Juan Island, WA  | Algal samples from dock tires                                        | 1/5/19          |

|      |                                    |                                   |          |
|------|------------------------------------|-----------------------------------|----------|
| FH6  | Friday Harbor, San Juan Island, WA | Algal samples from dock tires     | 1/5/19   |
| FH11 | Friday Harbor, San Juan Island, WA | Algal samples from dock tires     | 1/5/19   |
| WB4  | Wreck Beach, Vancouver, BC         | Red alga on sand flat at low tide | 8/7/18   |
| I2_1 | Queroianella, Italy                | Red alga on rock                  | 12/30/19 |

**Table S2. Genome assembly statistics.**

| Strain     | N50     | # contigs | Estimated genome size | Completeness (%) <sup>a</sup> | BUSCO (%) | Reference                   |
|------------|---------|-----------|-----------------------|-------------------------------|-----------|-----------------------------|
| S1         | 61925   | 398       | 7345427               | 99.29                         | 98.9      | Ulrich <i>et al.</i> 2021   |
| S7         | 54529   | 446       | 7118253               | 99.53                         | 99        | Ulrich <i>et al.</i> 2021   |
| S9         | 58396   | 410       | 7273775               | 99.29                         | 98.9      | Ulrich <i>et al.</i> 2021   |
| S15        | 5881945 | 7         | 7112772               | 99.53                         | 99        | Ulrich <i>et al.</i> 2021   |
| HP1        | 36836   | 890       | 7392918               | 99.29                         | 98.9      | Ulrich <i>et al.</i> 2021   |
| HP3        | 47151   | 516       | 7745077               | 99.53                         | 99        | This study                  |
| HP5        | 63851   | 422       | 7509040               | 99.53                         | 98.7      | This study                  |
| HP6        | 89219   | 374       | 7275896               | 99.53                         | 99        | Ulrich <i>et al.</i> 2021   |
| HP8        | 39624   | 1098      | 7987243               | 99.29                         | 99        | Ulrich <i>et al.</i> 2021   |
| HP9        | 36507   | 820       | 7003118               | 99.53                         | 98.8      | Ulrich <i>et al.</i> 2021   |
| HP10       | 37829   | 1214      | 7998694               | 99.29                         | 99        | Ulrich <i>et al.</i> 2021   |
| HP11       | 58563   | 573       | 7890141               | 99.53                         | 99        | This study                  |
| MSP2       | 48560   | 761       | 7090956               | 99.29                         | 98.9      | Ulrich <i>et al.</i> 2021   |
| GR1        | 41795   | 470       | 6175695               | 99.53                         | 97.8      | Ulrich <i>et al.</i> 2021   |
| Awaji      | 48724   | 758       | 7664765               | 99.29                         | 98.7      | Ulrich <i>et al.</i> 2021   |
| MU03       | 72346   | 458       | 6106866               | 99.53                         | 98.8      | Ulrich <i>et al.</i> 2021   |
| MU04       | 43413   | 616       | 6967674               | 99.53                         | 98.9      | Ulrich <i>et al.</i> 2021   |
| MU05       | 102057  | 138       | 5973023               | 96.7                          | 96.5      | Ulrich <i>et al.</i> 2021   |
| MU06       | 27254   | 1219      | 8857603               | 99.76                         | 98.7      | Ulrich <i>et al.</i> 2021   |
| MU07       | 32970   | 1060      | 8711329               | 99.76                         | 99        | Ulrich <i>et al.</i> 2021   |
| MU08       | 35868   | 443       | 6609766               | 98.82                         | 98.5      | Ulrich <i>et al.</i> 2021   |
| MU09       | 52586   | 337       | 6056097               | 98.58                         | 98.3      | Ulrich <i>et al.</i> 2021   |
| MU10       | 64774   | 293       | 6553268               | 99.53                         | 98.7      | Ulrich <i>et al.</i> 2021   |
| MU11       | 42252   | 406       | 7305935               | 99.53                         | 98        | Ulrich <i>et al.</i> 2021   |
| MU12       | 16188   | 795       | 7405669               | 98.82                         | 93.9      | Ulrich <i>et al.</i> 2021   |
| MU13       | 45821   | 486       | 7134557               | 99.53                         | 98.6      | Ulrich <i>et al.</i> 2021   |
| NIES2412   | 41849   | 895       | 7860937               | 99.29                         | 98.7      | Ulrich <i>et al.</i> 2021   |
| CCMEE 5410 | 4516345 | 23        | 8072368               | 99.53                         | 98.5      | Ulrich <i>et al.</i> 2021   |
| MBIC11017  | 6503724 | 10        | 8361599               | 99.53                         | 98.9      | Swingley <i>et al.</i> 2008 |
| P4         | 75683   | 271       | 6422642               | 99.53                         | 98.8      | This study                  |
| P9         | 68391   | 364       | 6939514               | 99.53                         | 98.9      | This study                  |
| FH1        | 45019   | 760       | 7870824               | 99.29                         | 98.7      | Ulrich <i>et al.</i> 2021   |
| FH2        | 30273   | 720       | 7979362               | 99.53                         | 98.9      | This study                  |
| FH6        | 60621   | 505       | 8028323               | 99.29                         | 98.9      | This study                  |
| FH11       | 89858   | 355       | 7247103               | 99.53                         | 99        | This study                  |
| WB4        | 39403   | 290       | 5820594               | 99.53                         | 98        | This study                  |
| I2.1       | 34011   | 858       | 8008360               | 99.76                         | 98.5      | This study                  |

<sup>a</sup> Genome completeness was assessed with CheckM v1.0.18

**Figure S1.** 16S rRNA gene phylogeny showing HICR111A as a member of the same clade as other nitrogen-fixing strains (GR1, MU08, MU09).

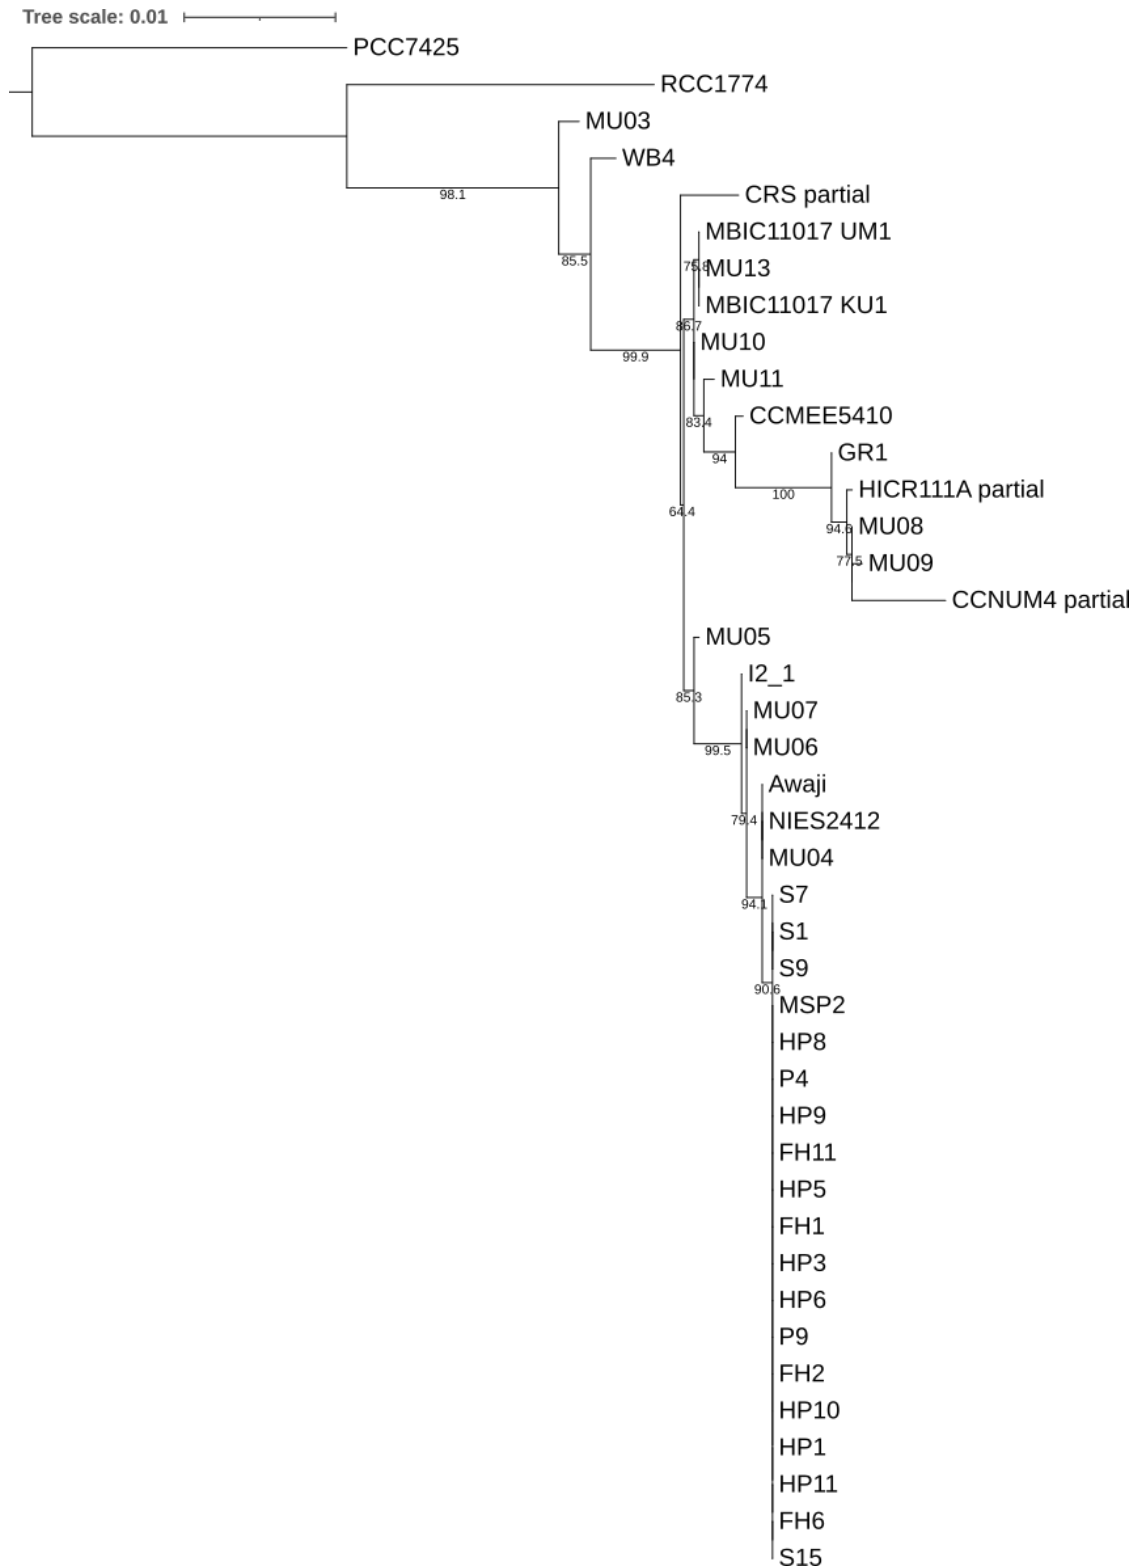

**Figure S2.** Dendrogram of *A. marina* iron gene content, hierarchically clustered by Euclidean distance. Bootstrap values for each cluster shown in green, and approximately unbiased P-values are shown in red.

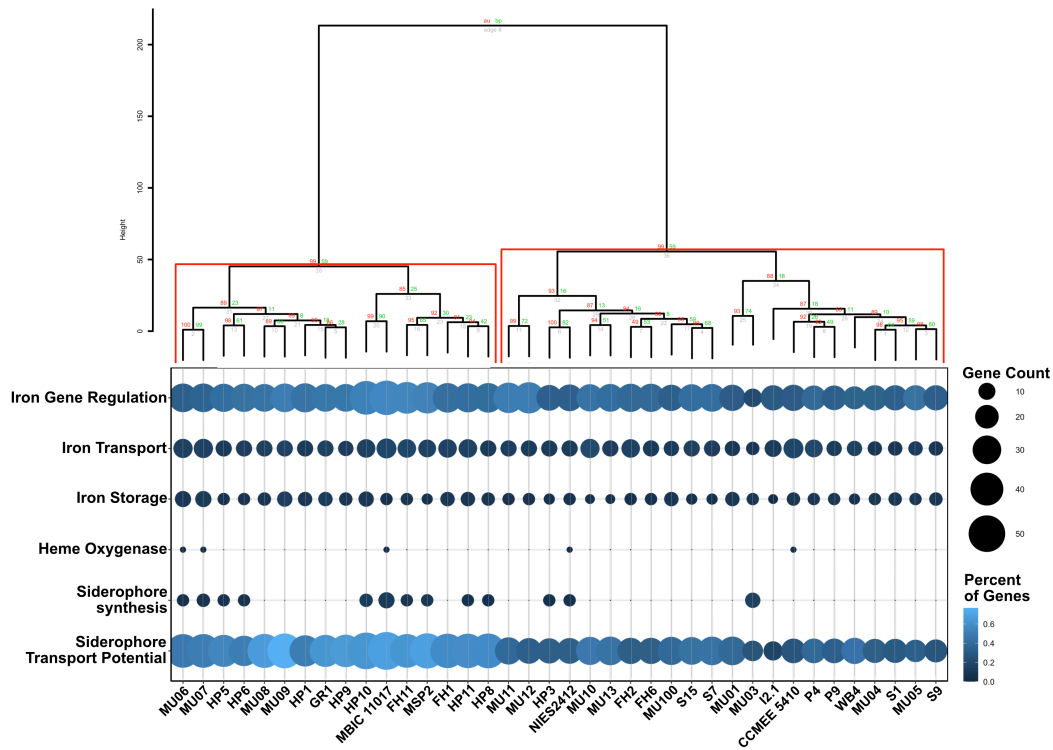

Supplement: s1 [file s1]
